# Supplementary material for: Early diagnosis of autoimmune diseases through electrochemical biosensing using a modified plastic chip electrode
Source: Royal Society of Chemistry journal article supplement (doi:10.1039/d4ay00789a), 2024-01-01
Supplement: d4ay00789a1.pdf [file d4ay00789a1.pdf]

Supporting Information

---

## Early Diagnosis of Autoimmune Diseases through Electrochemical Biosensing using Modified Plastic Chip Electrode

Kinjal B. Patel<sup>\*1,2</sup> b) Sunil Luhar<sup>1,2</sup>, c) Divesh N. Srivastava<sup>1,2a\*</sup>

<sup>1</sup>Analytical and Environmental Science Division & Centralized Instrument Facility, CSIR-Central Salt and Marine Chemicals Research Institute, Gijubhai Badheka Marg, Bhavnagar- 364001, Gujarat, India.

<sup>2</sup>Academy of Scientific and Innovative Research (AcSIR), Ghaziabad-201002

a) Corresponding author: [dnsrivastava@csmcri.res.in](mailto:dnsrivastava@csmcri.res.in)

b) [patelkinjal449@gmail.com](mailto:patelkinjal449@gmail.com)

c) [scientistksv99@gmail.com](mailto:scientistksv99@gmail.com)

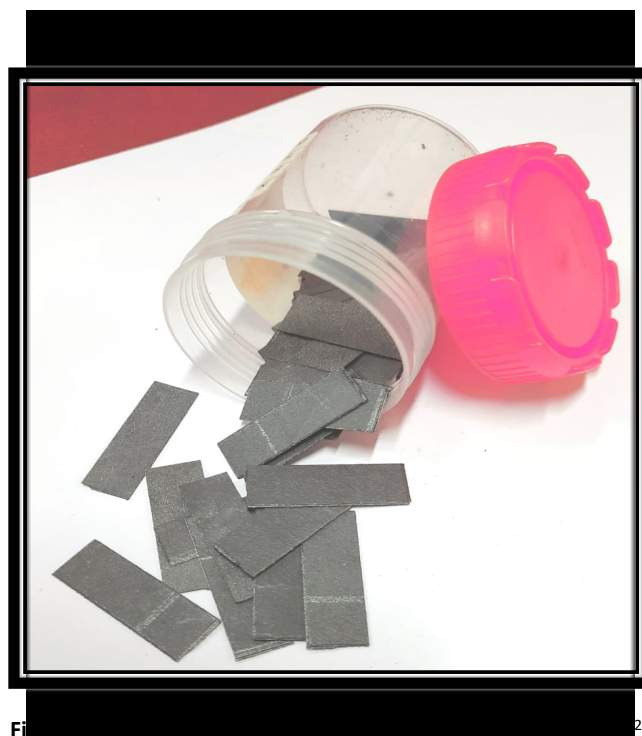

Figure S 2.

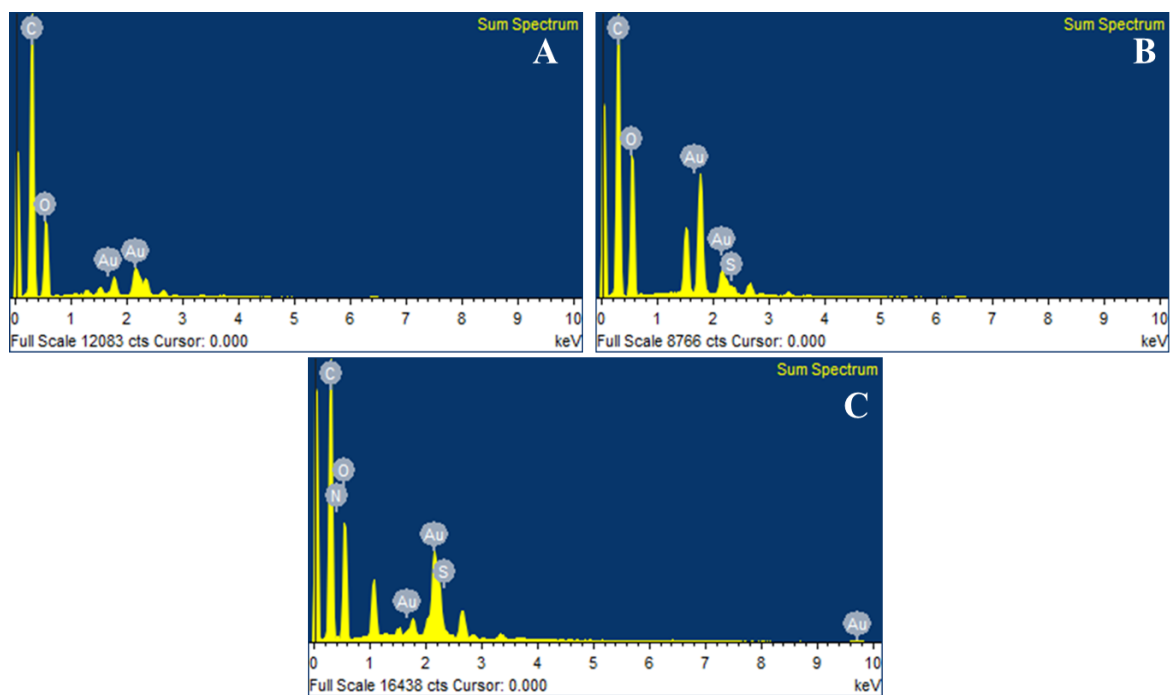

Figure S 2. EDX spectra of Au@PCE (A); MBA/Au@PCE (B); AB/MBA/Au@PCE (C)

**Table S 1** Quantitative composition of working platform using EDX analysis

| Electrode Platform | Carbon % | Oxygen % | Gold % | Sulphur % | Nitrogen % |
|--------------------|----------|----------|--------|-----------|------------|
| Au@PCE             | 59.68    | 33.09    | 7.23   |           |            |
| MBA/Au@PCE         | 51.34    | 40.87    | 6.88   | 0.91      |            |
| AB/MBA/Au@PCE      | 48.36    | 31.22    | 17.58  | 0.47      | 2.38       |

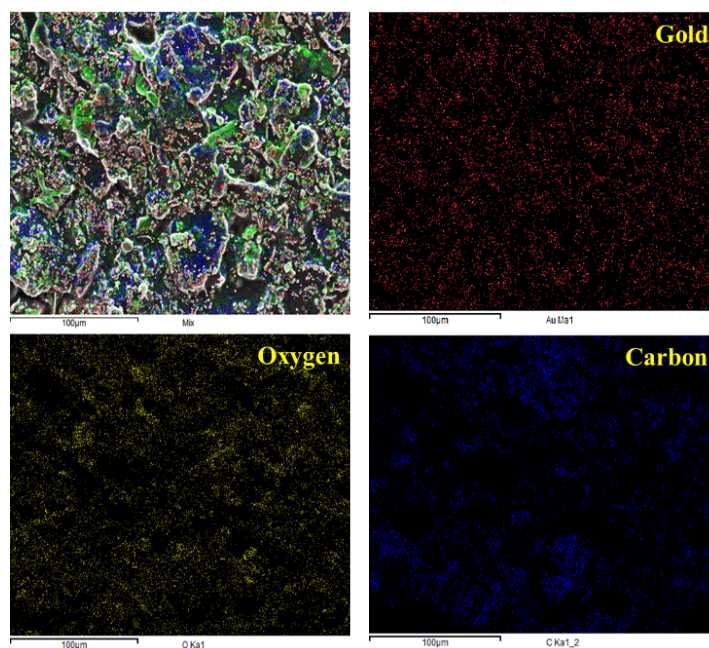

**Figure S 3.** EDX mapping image of Au@PCE.

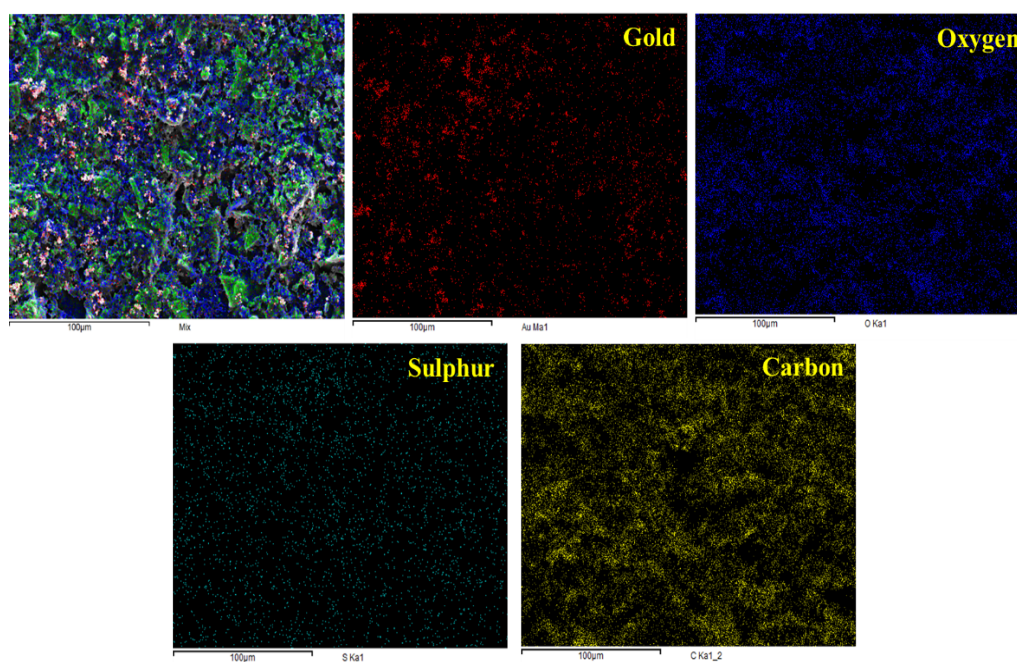

**Figure S 4.** EDX mapping image of MBA/Au@PCE.

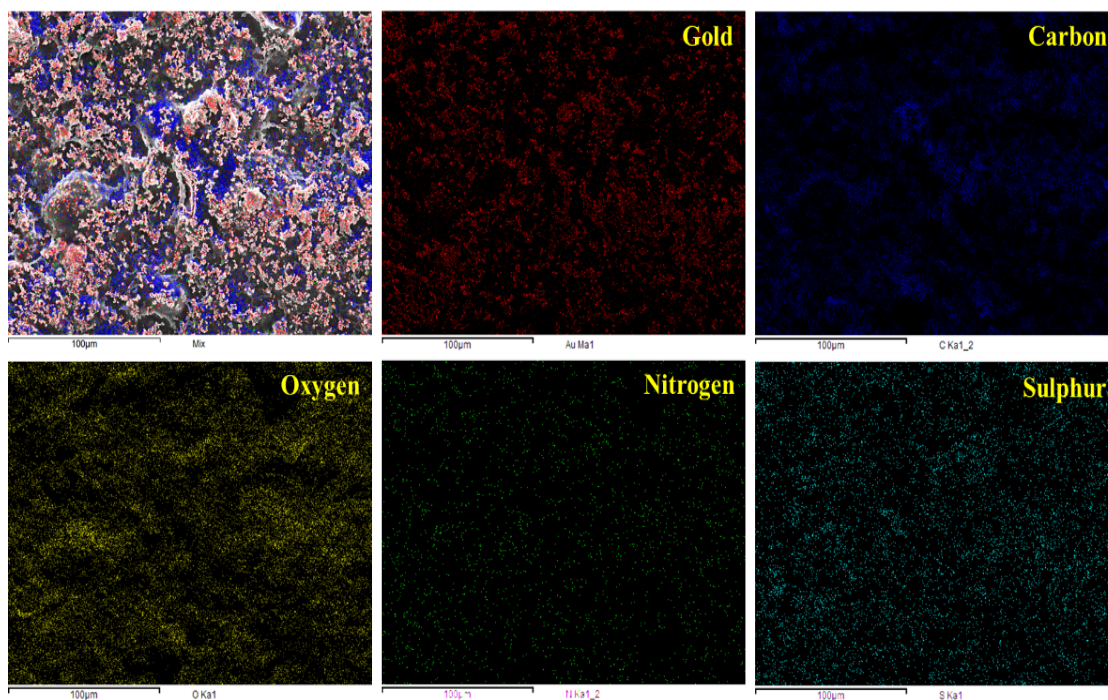

Figure S 5. EDX mapping image of AB/MBA/Au@PCE.

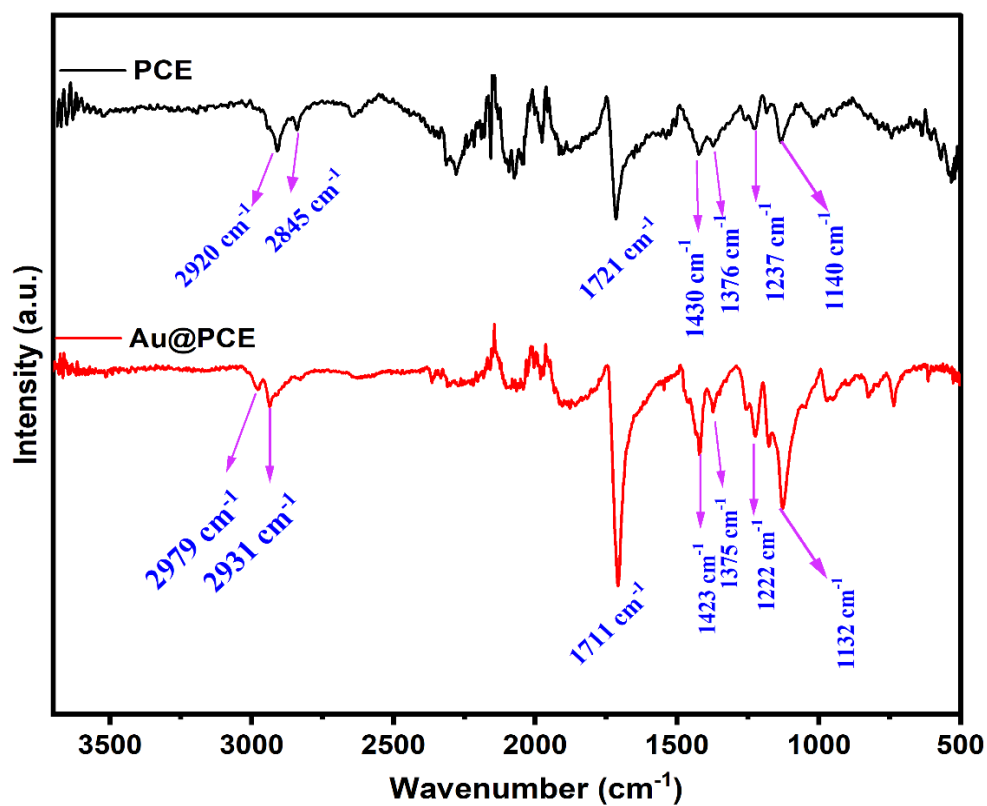

Figure S 6. FT-IR spectra of PCE and Au@PCE

**Table S 2** Comparison of Sensors for the chemokine detection reported in the literature

| SI No. | Platform                                                                    | Method                 | LOD           | Dynamic range      | Target analyte | References |
|--------|-----------------------------------------------------------------------------|------------------------|---------------|--------------------|----------------|------------|
| 1.     | IP 10 antibodies/ nanofilm ZnO/ Au electrode                                | Non faradic EIS        | Not available | 1-2000 pg/mL       | CXCL10         | 1          |
| 2.     | Thiol gold bounded DNA anchor strand/ Au disk electrode                     | Square wave voltametry | 60 pM         | 1-2000 nM          | CXCL10         | 2          |
| 3.     | 3,3'-dithiobis (sulfosuccinimidylpropionate) /IP-10 antibody/ ZnO           | Non-faradic EIS        | 1 pg/mL       | 1-512 pg/mL        | CXCL10         | 3          |
| 4.     | DNA barcode- streptavidin                                                   | Flurosense             | 14 pg/mL      | 0-4000 pg/mL       | CXCL9          | 4          |
| 5.     | Magnetic nanoparticles/ gold nanoparticles/screen printed electrode         | Chronoamperometry      | 65 pg/mL      | 0-10000 pg/mL      | CXCL9          | 5          |
| 6.     | 2,2':5',2''-terthiophene-3' (p-benzoic acid) /Aunps/glassy carbon electrode | Chronoamperometry      | 0.078 ng/mL   | 0.1-10 ng/mL       | CXCL5          | 6          |
| 7.     | 6-phosphonohexanoic acid/ ITO                                               | EIS                    | 6 fg/mL       | 0.02-3 pg/mL       | CXCL8          | 7          |
| 8.     | 3-(triethoxysilyl)propylisocyanate/fluorine tin oxide                       | EIS                    | 11.9 fg/mL    | 0.02-4 pg/mL       | CXCL8          | 8          |
| 9.     | Carboxylated magnetic microparticles/screen printed carbon electrode        | Amperometry            | 0.8 ng/mL     | 1-75 ng/mL         | CXCL7          | 9          |
| 10.    | CXCL-10 antibody/MBA/ Au@PCE                                                | EIS                    | 0.72 pg/mL    | 1 pg/mL - 50 ng/mL |                | This work  |

1. A. S. Tanak, S. Muthukumar, S. Krishnan, K. L. Schully, D. V. Clark and S. Prasad, *Biosens Bioelectron*, 2021, **171**, 112726.
2. A. J. Bonham, N. G. Paden, F. Ricci and K. W. Plaxco, *Analyst*, 2013, **138**, 5580-5583.
3. B. Jagannath, M. Pali, K.-C. Lin, D. Sankhala, P. Naraghi, S. Muthukumar and S. Prasad, *Advanced Materials Technologies*, 2022, **7**, 2101356.
4. I. Lee, S.-J. Kwon, M. Sorci, P. S. Heeger and J. S. Dordick, *Analytical Chemistry*, 2021, **93**, 16528-16534.
5. K. L. Singampalli, C. Neal – Harris, C. Yee, J. S. Lin and P. B. Lillehoj, *Advanced Sensor Research*, 2024, **n/a**, 2400004.
6. S. Chung, P. Chandra, J. P. Koo and Y.-B. Shim, *Biosensors and Bioelectronics*, 2018, **100**, 396-403.
7. E. B. Aydın and M. K. Sezgentürk, *Analytical Biochemistry*, 2018, **554**, 44-52.
8. E. B. Aydın and M. K. Sezgentürk, *Electroanalysis*, 2021, **33**, 1596-1605.
9. S. Guerrero, E. Sánchez-Tirado, L. Agüí, A. González-Cortés, P. Yáñez-Sedeño and J. M. Pingarrón, *Talanta*, 2021, **234**, 122705.
